# Supplementary material for: Elucidation of the reaction mechanism upon lithiation and delithiation of Cu0.5TiOPO4
Source: Royal Society of Chemistry journal article supplement (doi:10.1039/c4ta01627k), 2014-01-01
Supplement: c4ta01627k1.pdf [file c4ta01627k1.pdf]

## Supporting information

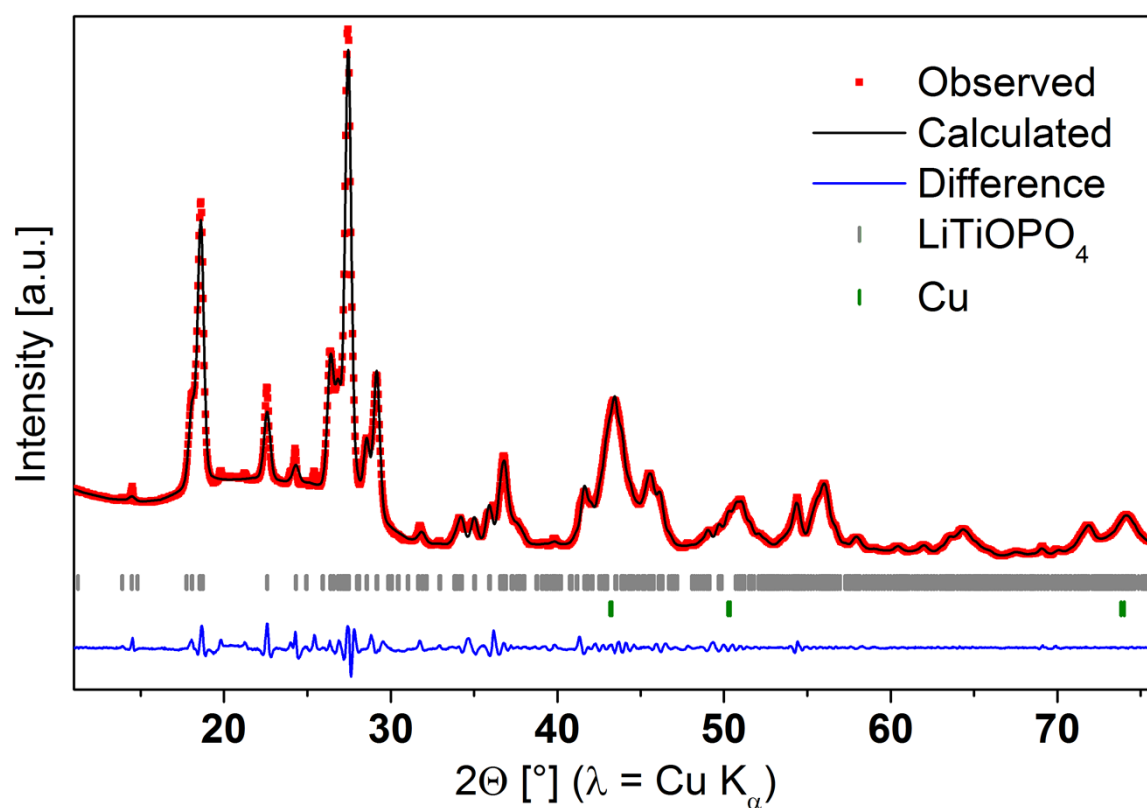

Figure S1: Refinement of the XRD of  $\text{Cu}_{0.5}\text{TiOPO}_4$  lithiated to 1.71 V (sample c).

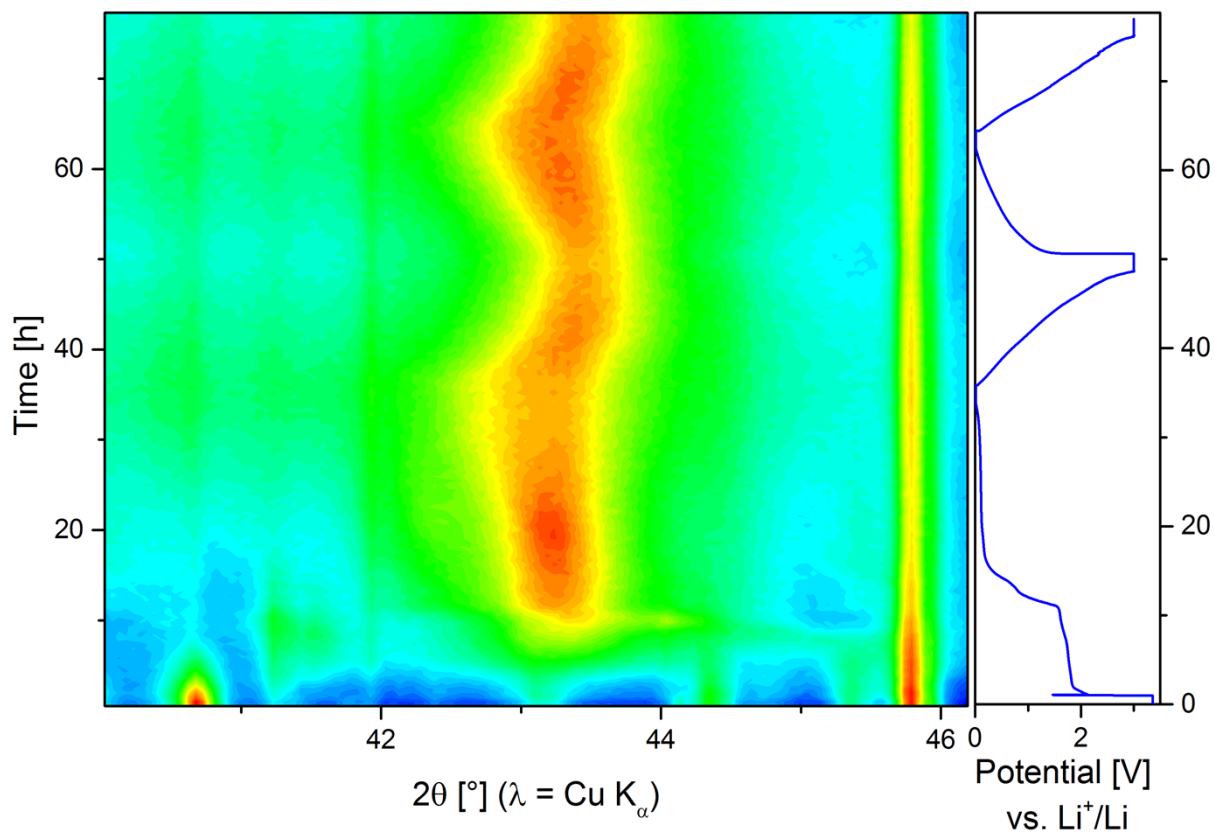

Figure S2: Contour plot of an in situ XRD measurement of an electrode containing  $\text{Cu}_{0.5}\text{TiOPO}_4$  around the copper 111 reflection ( $43.3^\circ$ ) for two cycles at a specific current of  $21.1 \text{ A/kg}$  (blue: low intensity; red: high intensity). On the right hand side, the corresponding galvanostatic curve is shown.

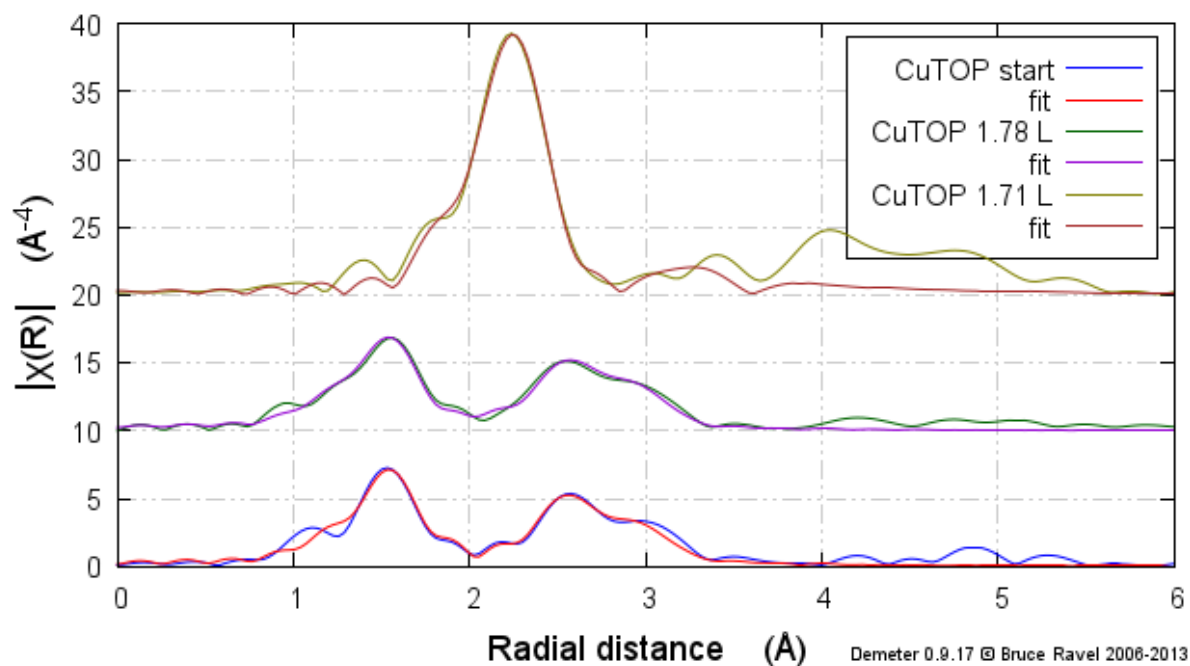

Figure S3: Fit of the Fourier transform of EXAFS-spectra of pristine  $\text{Cu}_{0.5}\text{TiOPO}_4$  and of  $\text{Cu}_{0.5}\text{TiOPO}_4$  lithiated to  $1.78 \text{ V}$  (sample b) and  $1.71 \text{ V}$  (sample c) (from bottom to top).

**Table S1: Fitted scattering paths of the EXAFS-spectra of pristine  $\text{Cu}_{0.5}\text{TiOPO}_4$  and  $\text{Cu}_{0.5}\text{TiOPO}_4$  lithiated to 1.78 V and 1.71 V.**

| Sample                                                                  | Path          | N  | S02   | sigma <sup>2</sup> | e0     | $\Delta r$ | Reff    | R       |
|-------------------------------------------------------------------------|---------------|----|-------|--------------------|--------|------------|---------|---------|
| $\text{Cu}_{0.5}\text{TiOPO}_4$<br>start<br><br>R-factor:<br>0.0043203  | O5.1          | 4  | 0.701 | 0.00366            | -0.731 | -0.03121   | 1.97780 | 1.94659 |
|                                                                         | O2.1          | 2  | 0.701 | 0.01308            | -0.731 | -0.05080   | 2.29030 | 2.23950 |
|                                                                         | Ti1.1         | 2  | 0.701 | 0.00431            | -0.731 | 0.00511    | 2.93250 | 2.93762 |
|                                                                         | P1.1          | 2  | 0.701 | 0.01456            | -0.731 | -0.13074   | 3.17800 | 3.04726 |
|                                                                         | Ti1.2         | 2  | 0.701 | 0.00283            | -0.731 | 0.00131    | 3.33290 | 3.33421 |
| $\text{Cu}_{0.5}\text{TiOPO}_4$<br>1.78 V<br><br>R-factor:<br>0.0058159 | O5.1          | 4  | 0.880 | 0.00564            | -0.358 | -0.02390   | 1.97780 | 1.95390 |
|                                                                         | O2.1          | 2  | 0.880 | 0.01380            | -0.358 | -0.00977   | 2.29030 | 2.28053 |
|                                                                         | Ti1.1         | 2  | 0.880 | 0.00547            | -0.358 | 0.01159    | 2.93250 | 2.94409 |
|                                                                         | P1.1          | 2  | 0.880 | 0.02346            | -0.358 | -0.11668   | 3.17800 | 3.06132 |
|                                                                         | Ti1.2         | 2  | 0.880 | 0.00387            | -0.358 | 0.00808    | 3.33290 | 3.34097 |
| $\text{Cu}_{0.5}\text{TiOPO}_4$<br>1.71 V<br><br>R-factor:<br>0.0111593 | Cu.1          | 12 | 0.625 | 0.00895            | 4.478  | -0.01539   | 2.55270 | 2.53731 |
|                                                                         | Cu.2          | 6  | 0.625 | 0.01333            | 4.478  | -0.02176   | 3.61000 | 3.58824 |
|                                                                         | Cu.1-<br>Cu.1 | 48 | 0.625 | 0.01790            | 4.478  | -0.02308   | 3.82900 | 3.80592 |
|                                                                         | Cu.1-<br>Cu.1 | 24 | 0.625 | 0.01790            | 4.478  | -0.02627   | 4.35770 | 4.33143 |
|                                                                         | Cu.1-<br>Cu.2 | 48 | 0.625 | 0.02228            | 4.478  | -0.02627   | 4.35770 | 4.33143 |
|                                                                         | Cu.3          | 24 | 0.625 | 0.02332            | 4.478  | -0.02665   | 4.42130 | 4.39465 |
|                                                                         | Cu.1-<br>Cu.1 | 48 | 0.625 | 0.01790            | 4.478  | -0.02871   | 4.76330 | 4.73459 |
|                                                                         | Cu.1-<br>Cu.3 | 96 | 0.625 | 0.03227            | 4.478  | -0.02871   | 4.76330 | 4.73459 |

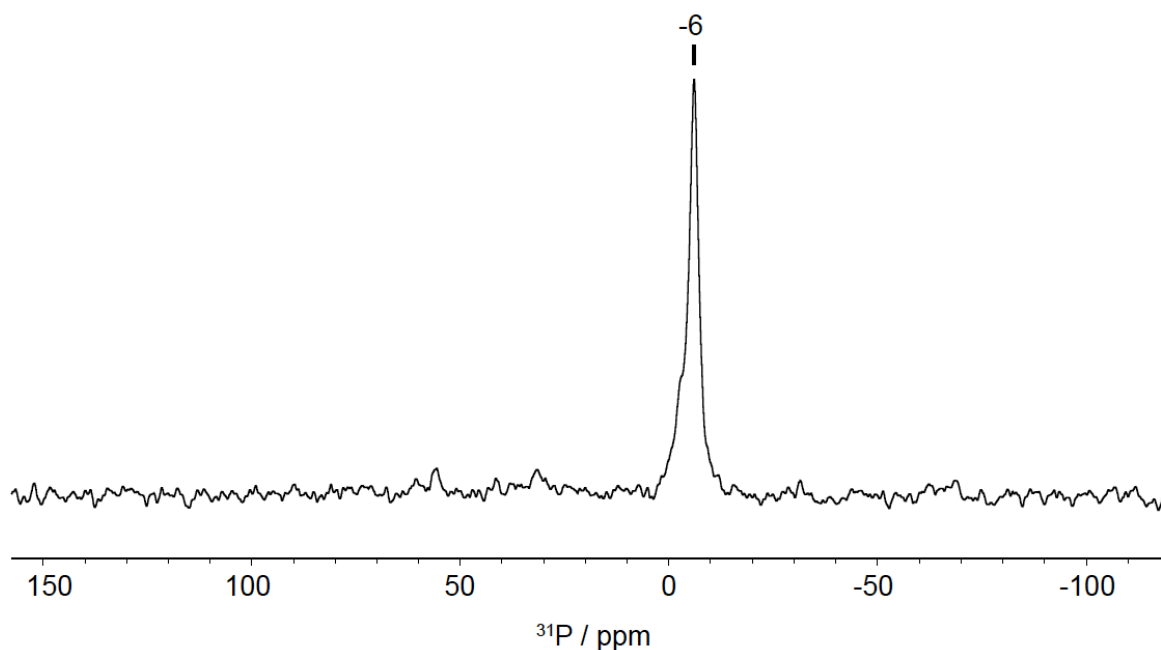

**Figure S4:**  $^{31}\text{P}$  NMR spectra of triphenyl phosphine. The spinning rate was set to 10 kHz. The recycling delay was set to 1 s. A 120 kHz radio frequency  $90^\circ$  pulse was used to recorded this spectra.

**Table S2:** CASTEP NMR calculations and experimental chemical shift ( $\delta_{\text{iso}}$ ) of triphenyl phosphine (external reference), triclinic  $\text{LiTiOPO}_4$ , and orthorhombic  $\text{LiTiOPO}_4$ . The coordinates were taken from COD <sup>1</sup> for  $\text{PPh}_3$  and from ICSD for  $\text{LiTiOPO}_4$ .

| Compound                        | Calculated $\delta_{\text{iso}}$ (ppm) | Normalised $\delta_{\text{iso}}$ (ppm) | Experimental $\delta_{\text{iso}}$ (ppm) |
|---------------------------------|----------------------------------------|----------------------------------------|------------------------------------------|
| $\text{PPh}_3$                  | 300                                    | 6                                      | 6                                        |
| $\text{LiTiOPO}_4$ triclinic    | 285/290*                               | -21/-16*                               | -9/-3*                                   |
| $\text{LiTiOPO}_4$ orthorhombic | 289                                    | -17                                    | -                                        |

\* The peaks have the same intensities.

1. Grazulis, S.; Daskevicius, A.; Merkys, A.; Chateigner, D.; Lutterotti, L.; Quiros, M.; Serebryanaya, N. R.; Moeck, P.; Downs, R. T.; Le Bail, A., *Nucleic Acids Res.* **2012**, *40*, D420.
